# Supplementary material
Source: PubMed Central journal article supplement (PMC10621335)

734 **Supplemental information**

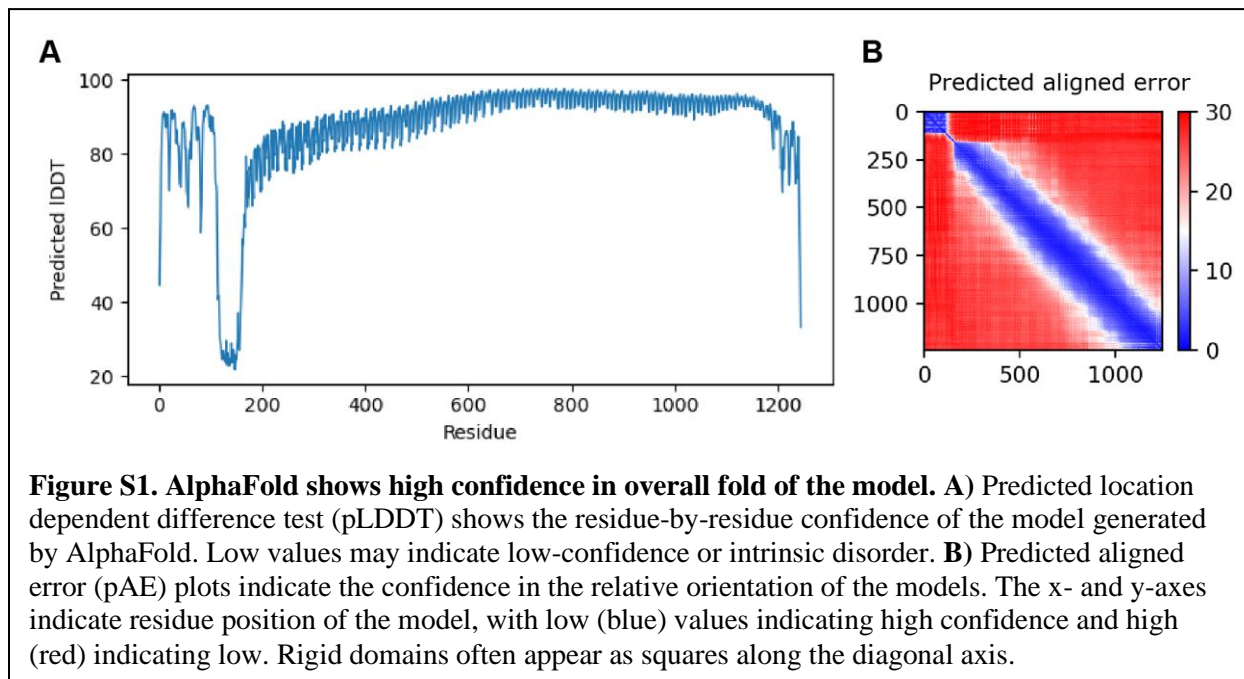

735

736

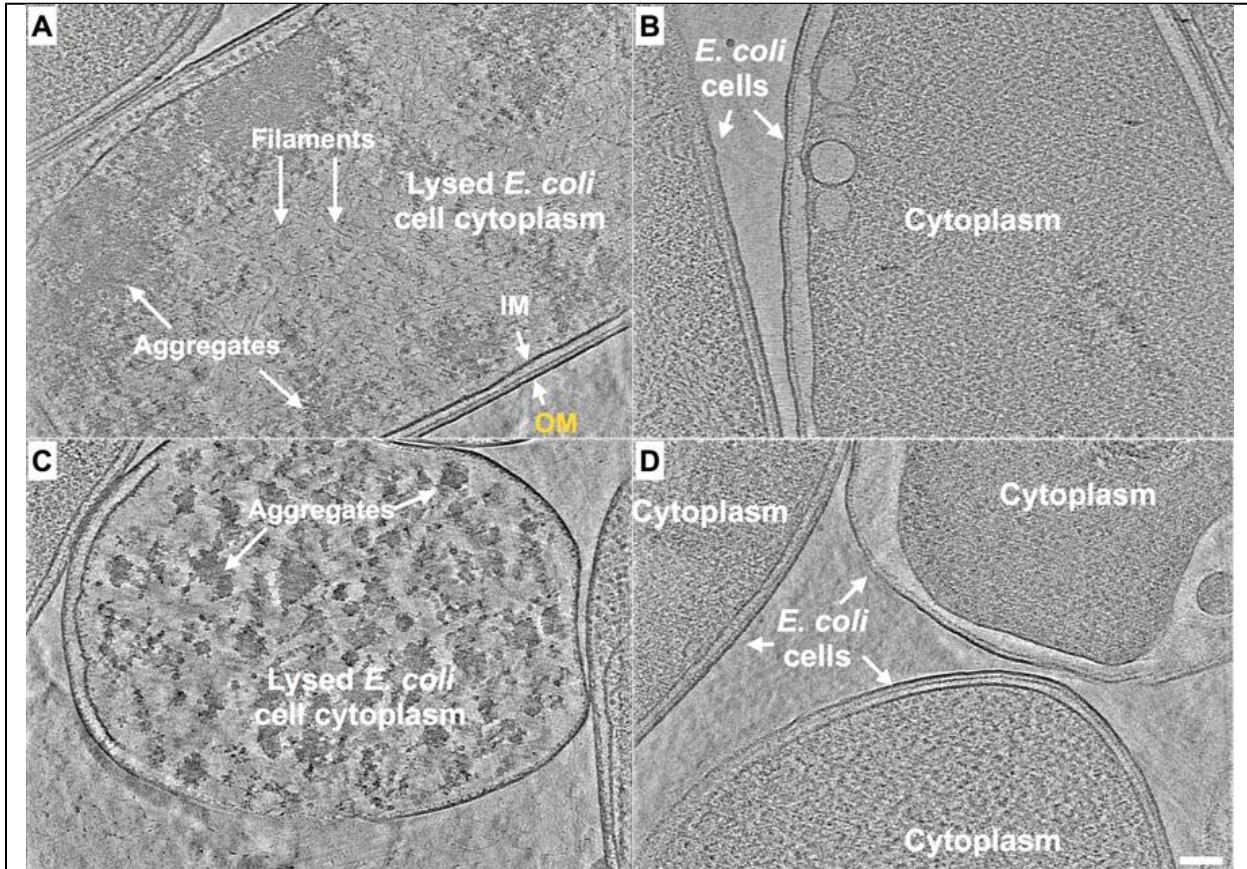

**Figure S4. *E. coli* expressing INP mutant lacking R-coils show no fibre clusters as observed in those cells overexpressing wild-type INP. A-D)** Representative snapshots from 3-D cryo-tomograms showing cytoplasmic and extracellular features of various *E. coli* cells overexpressing an INP mutant in which all but the C-terminal R-coil have been replaced by WO-coils. All four images are in the same scale and the scale bar represents 100 nm.

737

738

739

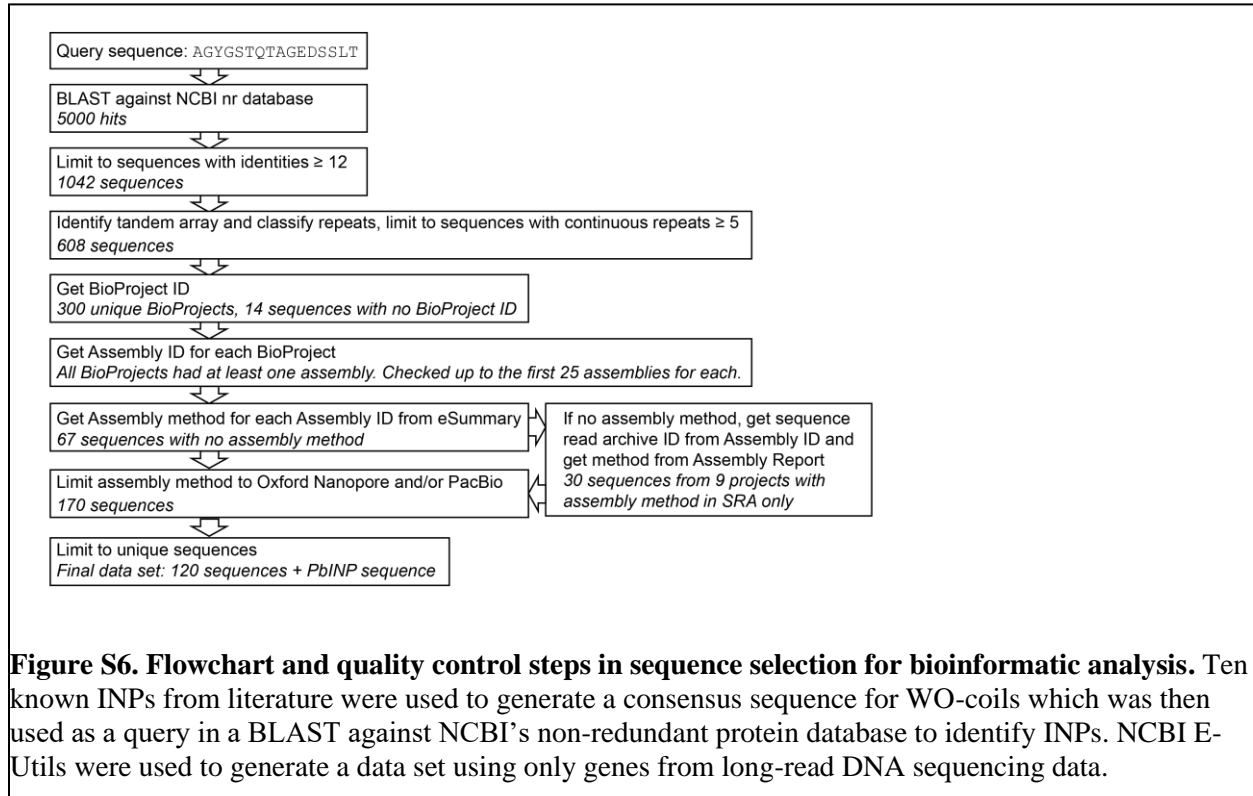

Supplement: NIHPP2023.08.03.551873v3-supplement-5.pdf [file NIHPP2023.08.03.551873v3-supplement-5.pdf]
